# Supplementary material for: One-step electrochemical preparation of a reduced graphene oxide/poly(sulfosalicylic acid) nanocomposite film for detection of acetaminophen and its application in human urine and serum studies
Source: Royal Society of Chemistry journal article supplement (doi:10.1039/c5ay01654a), 2015-01-01
Supplement: c5ay01654a1.pdf [file c5ay01654a1.pdf]

## Supplementary Material

### **One-step electrochemical preparation of reduced graphene oxide/poly (sulfosalicylic acid) nanocomposite film for detection of acetaminophen and its application in human urine and serum studies**

Bo Zheng, Cong Li, Yaru Li, Yue Gu, Xiaoyi Yan, Liu Tang, Ruixue Chen,

Zhiquan Zhang\*

College of Chemistry, Jilin University, Changchun 130012, P. R. China.

\* Corresponding author. Tel: +86-431-85168352-7; Fax: +86-431-85168399; *E-mail*

*address:* zzq@jlu.edu.cn (Z. Zhang)

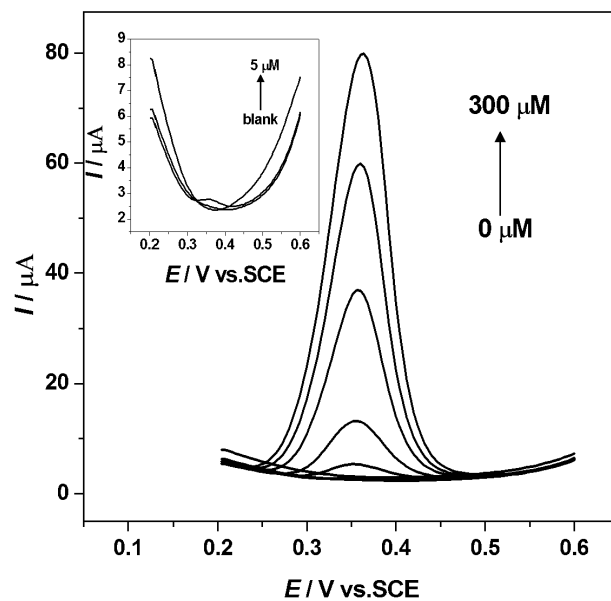

Fig. S1 DPVs of AC with different concentrations (0, 1, 5, 10, 50, 100, 200, 300  $\mu\text{M}$ ) at the PSA/rGO/GCE in 0.1 M PBS (pH 6.0). Inset: the different concentrations of PCT (0, 1, 5  $\mu\text{M}$ ). A step increment = 4 mV; pulse amplitude = 50 mV; pulse width = 60 ms; pulse periods = 200 ms.
